# Supplementary material for: Elevated autocrine chemokine ligand 18 expression promotes oral cancer cell growth and invasion via Akt activation
Source: PubMed Central journal article supplement (PMC4941312; doi:10.18632/oncotarget.7585), 2016-02-22
Supplement: oncotarget-07-16262-s001.pdf [file oncotarget-07-16262-s001.pdf]

## Elevated autocrine chemokine ligand 18 expression promotes oral cancer cell growth and invasion via Akt activation

### Supplementary Materials

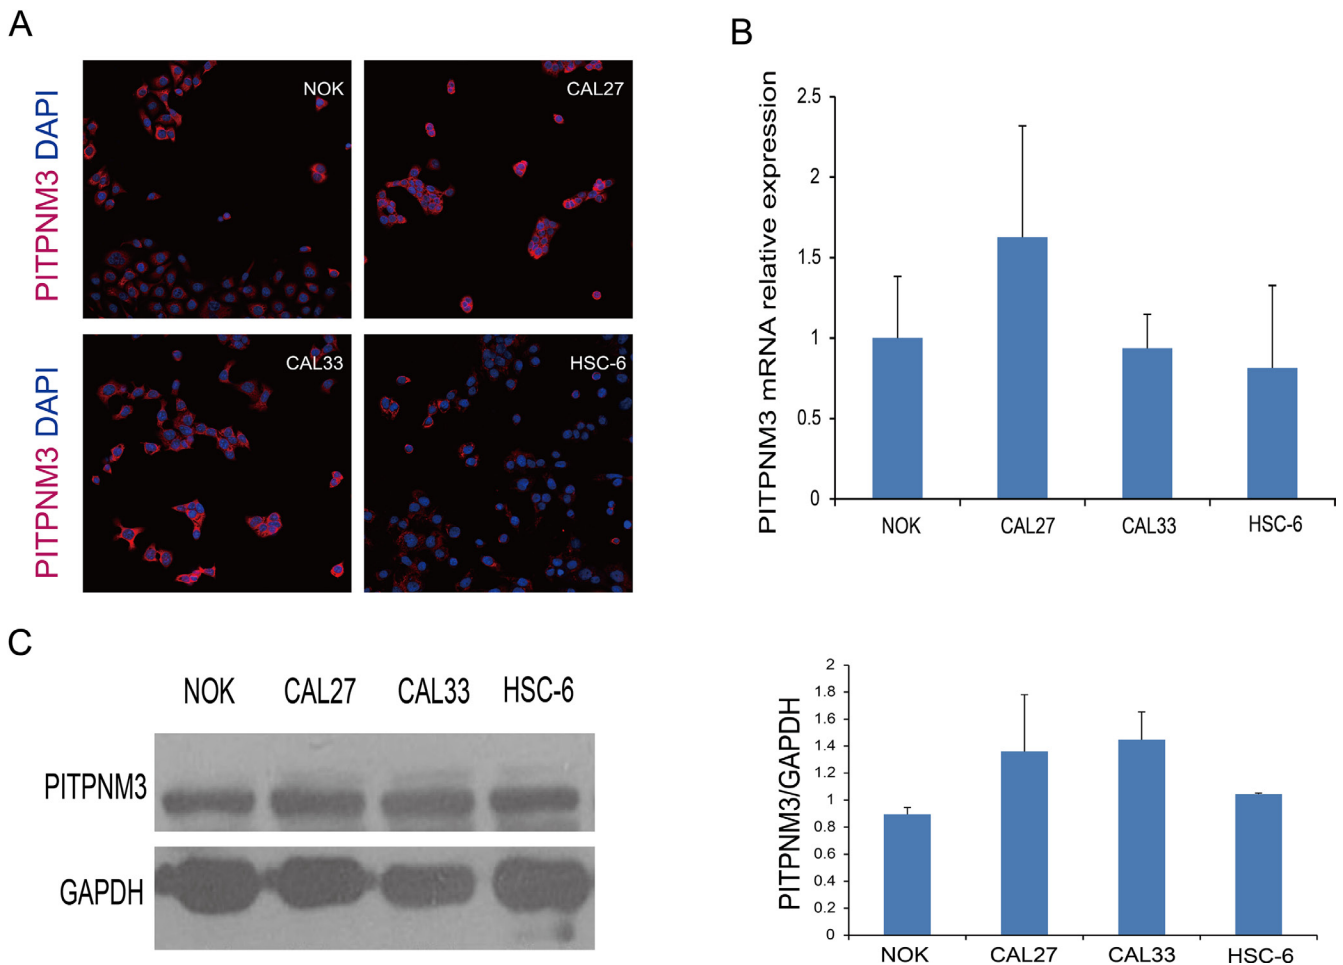

**Supplementary Figure S1: Expression of PITPNM3 in OSCC and NOK cells.** (A) Immunofluorescence staining of PITPNM3 (red) in oral cancer cells (HSC-6, CAL33 and CAL27) and NOK cells. Nuclei were counterstained with DAPI (blue). (magnification 50 ×) (B and C) Quantitative PCR and western blotting assays for PITPNM3 in oral cancer cells (HSC-6, CAL33 and CAL27) and NOK cells. Columns represent mean ± SEM of triplicate determinations.

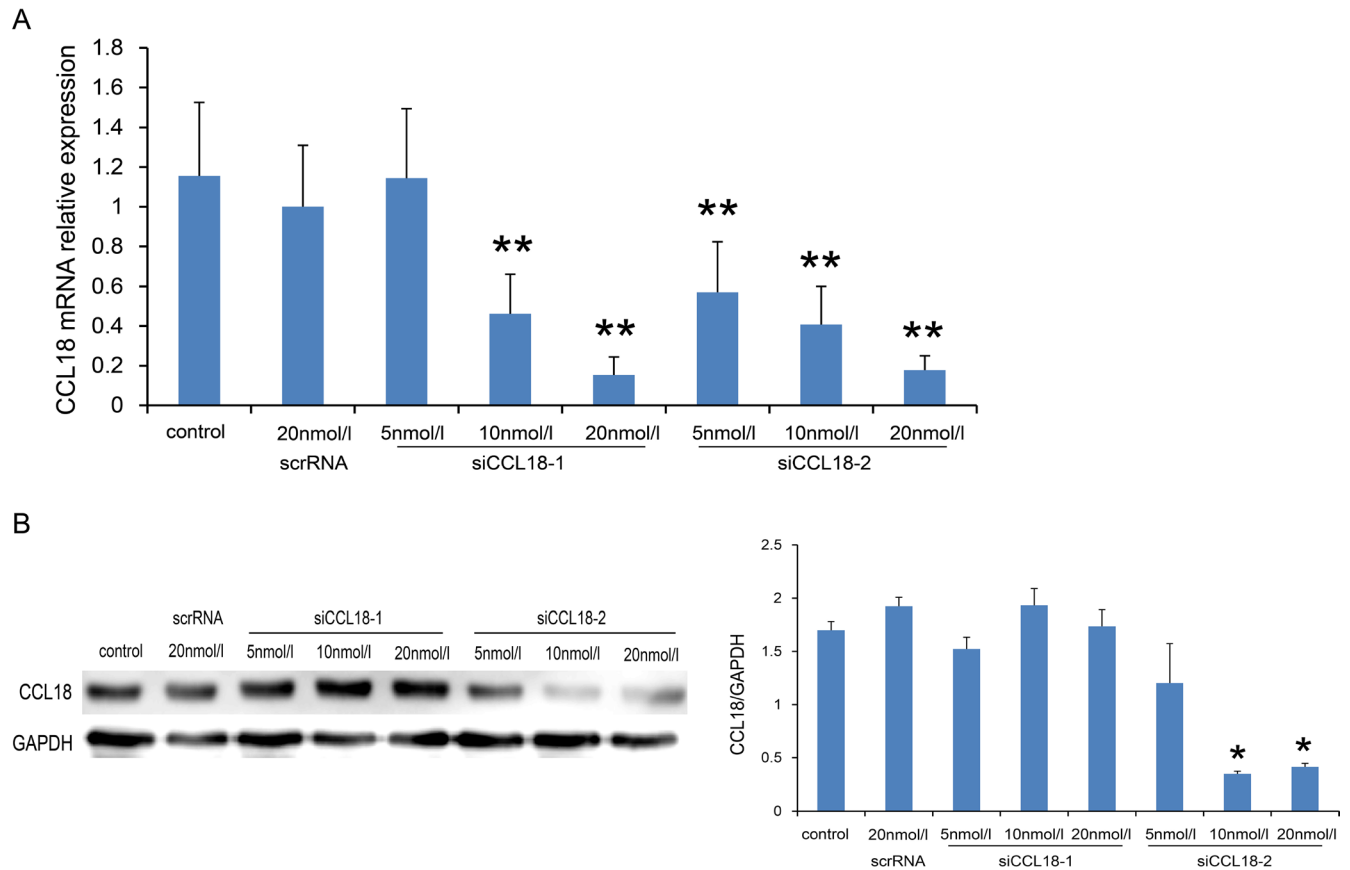

**Supplementary Figure S2: Efficiency of CCL18 RNA interference in HSC-6 cells.** HSC-6 cells were transfected with siCCL18-1 and siCCL18-2 respectively. After 48 h the cells were harvested. **(A)** Quantitative RT-PCR analysis of CCL18 mRNA levels. **(B)** Western blotting analysis of CCL18 protein levels. Densitometry was used to determine CCL18/GAPDH ratios. Data represent mean  $\pm$  SEM of three independent experiments. (\* $P < 0.05$  and \*\* $P < 0.01$  vs. cells transfected with scrRNA).
